# Supplementary material
Source: publisher figshare collection journal article supplement (https://diabetesjournals.figshare.com/articles/dataset/_/21922860)

**Supplemental Figure 1.** Scatterplots for the association of fasting PI:CP with  $DI_d$ ,  $DI_s$ , and  $DI_{tot}$  in African American (AA) and European American (EA) participants. All variables are log transformed.

**A)** Fasting PI:CP vs.  $DI_d$  in AA participants

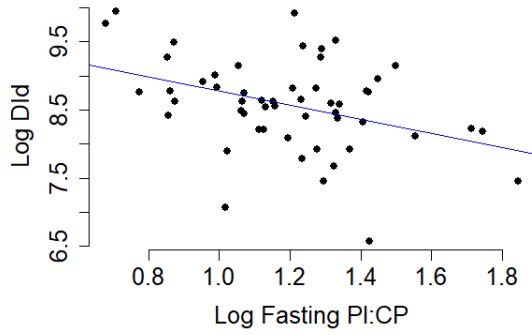

**B)** Fasting PI:CP vs.  $DI_d$  in EA participants

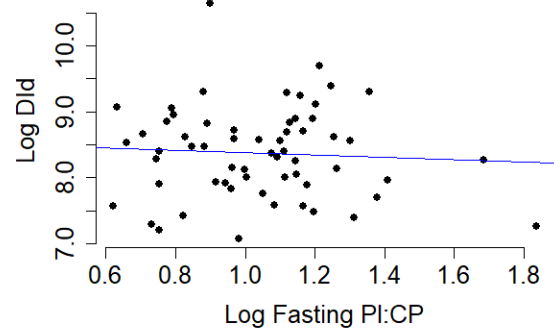

**C)** Fasting PI:CP vs.  $DI_s$  in AA participants

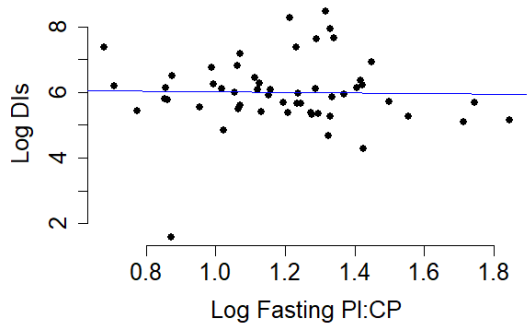

**D)** Fasting PI:CP vs.  $DI_s$  in EA participants

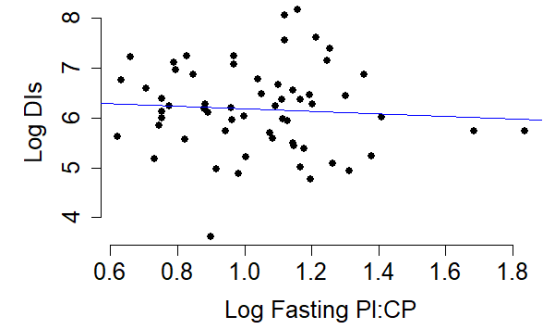

**E)** Fasting PI:CP vs.  $DI_{tot}$  in AA participants

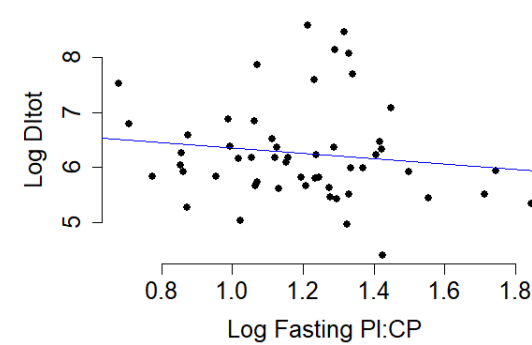

**F)** Fasting PI:CP vs.  $DI_{tot}$  in EA participants

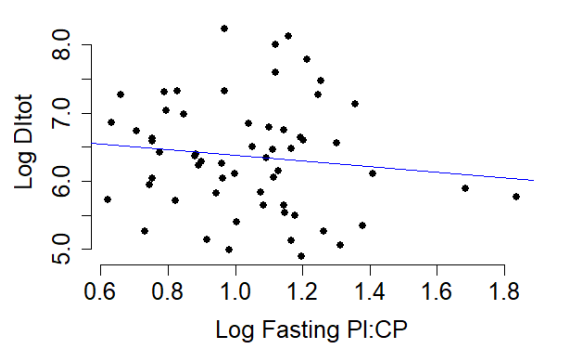

Supplement: Supplementary file 1 [file 38890794]
